# Supplementary material
Source: PubMed Central journal article supplement (PMC4281515)
Supplement: NIHMS608688-supplement-01.pdf [file NIHMS608688-supplement-01.pdf]

Supplemental Fig. 1

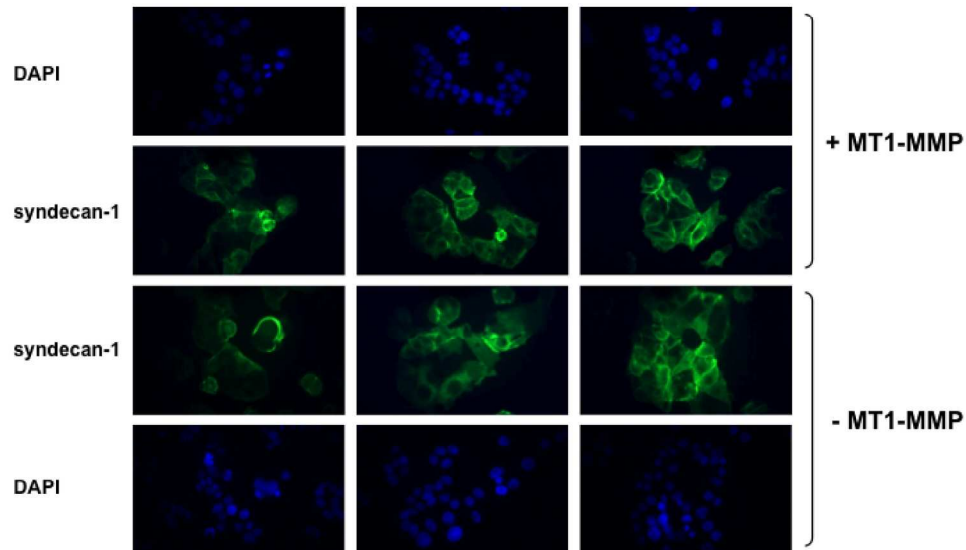

Supplemental Figure 1. Immunofluorescence analysis of syndecan-1 levels in MCF-7 cells with or without MT1-MMP. MT1-MMP Tet-Off MCF-7 cells grown for 24 h in the presence or absence of DOX (1  $\mu$ g/ml) were analyzed by immunofluorescence as described in Materials and Methods. This experiment was repeated three times with comparable results.  
190x142mm (300 x 300 DPI)

Supplemental Fig. 2

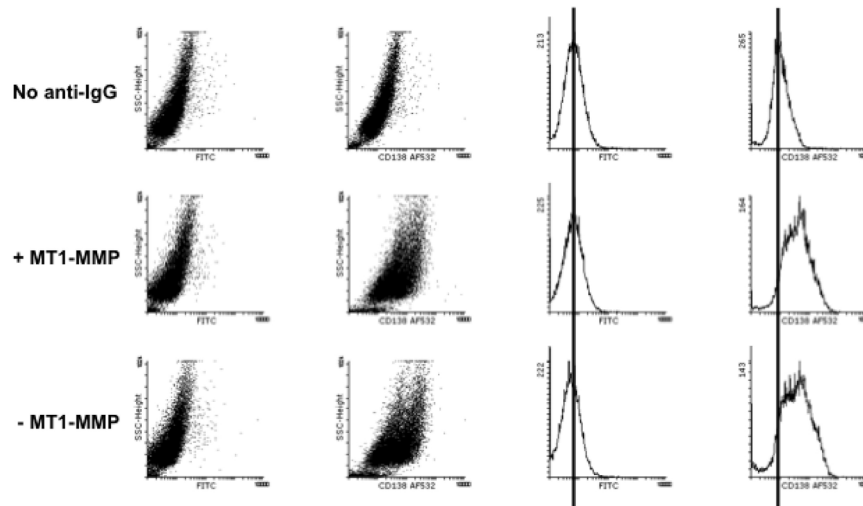

Supplemental Figure 2. Flow cytometric analysis of syndecan-1 levels in MCF-7 cells with or without MT1-MMP. MT1-MMP Tet-Off MCF-7 cells grown for 24 h in the presence or absence of DOX (1  $\mu$ g/ml) were analyzed by flow cytometry as described in Materials and Methods. This experiment was repeated three times with comparable results.  
190x142mm (300 x 300 DPI)
